1 The sowing date changed the temperature and light conditions in the field modified the  
2 cadmium content of brown rice (*Oryza sativa* L.) by regulating the expression of Cd-  
3 related genes

4 Zhongwen Rang<sup>1</sup>, Huan Xiao<sup>3</sup>, Zhenxie Yi<sup>1,2</sup>, Xuehua Wang<sup>1</sup>, Qiaomao Chen<sup>1</sup>, Yu Kuang<sup>1</sup>, Hejun  
5 Ao<sup>1,2\*</sup>

6 <sup>1</sup>*College of Agronomy, Hunan Agricultural University, Changsha 410128, China*

7 <sup>2</sup>*Key Laboratory of Ministry of Agriculture for Multi-cropping Cultivation and Farming System,*  
8 *Changsha 410128, China*

9 <sup>3</sup>*College of Water Resources & Civil Engineering, Hunan Agricultural University, Changsha*  
10 *410128, China*

11 \* Corresponding author

12 **Abstract:**

13 Cadmium (Cd) contamination in rice is a potential health hazard when ingested through the  
14 food chain worldwide. Reducing the Cd content in rice through agronomic measures is an effective  
15 way to reduce the risk of Cd contamination to human health. In order to clarify the correlation  
16 between temperature and light conditions and Cd accumulation (Cd-A) and Cd content of brown rice  
17 (CdBR) during the field growth period (FGP) of rice, consequently provide a theoretical basis for the  
18 selection of sowing date (SD) for “Low-Cd-Rice” production, field experiment with different SDs  
19 was carried out by using two rice varieties with different Cd accumulation characteristics  
20 (Luliangyou 996, V1, a high Cd accumulation variety; Zhuliangyou 819, V2, a low Cd accumulation  
21 variety). The results showed that the temperature and light factors such as mean soil temperature

22 (ST), mean air temperature (AT), soil accumulation temperature (SAT), air accumulation  
23 temperature (AAT), ultraviolet radiation accumulation (UR), photosynthetic radiation accumulation  
24 (PR), light intensity accumulation (I) and sunshine hours accumulation (SH) varied to different  
25 degrees under different SDs; The difference in CdBR in two varieties could be up to 2.82 and 8.48  
26 times respectively among SDs, with the CdBR of S4 and S5 of V2 being lower than the national  
27 standard of 0.2 mg/kg. The relative expression of *OsIRT1* in the root system was significantly  
28 positively correlated with ST, SAT, AT, AAT, and SH, while *OsNramp5*, *OsNramp1*, and *OsHMA3*  
29 showed significant negative correlations with ST, SAT, AT, AAT, and SH in relative expression in  
30 the root system; *OsIRT1* expressed in the roots of V1 was significantly negatively correlated with  
31 CdBR, while *OsHMA3* expression was significantly positively correlated with CdBR; *OsLCD*,  
32 *OsNramp1*, and *OsHMA3* expression in the roots of V2 were significantly positively correlated with  
33 Cd-A and CdBR, while *OsIRT1* in the roots of V2 and *OsLCT1* in the leaves were significantly  
34 negatively correlated with Cd-A; The expression of *OsNramp5* in roots was significantly negatively  
35 correlated with Cd-A and CdBR in both V1 and V2. Bias correlation analysis showed that ST, SAT,  
36 AT, and AAT were significantly negatively correlated with both Cd-A and CdBR; SH was  
37 significantly negatively correlated with CdBR in V1. Summarily, the temperature and light  
38 conditions during the FGP of rice and their regulation of the expression levels of related genes could  
39 be changed by sowing selection, so as to achieve safe production of rice under Cd-contaminated  
40 fields.

41 **Keywords:**

42 Sowing date; Temperature and light factors; Cadmium; Real-time PCR; Partial correlation; Rice

## 43 **1 Introduction**

44 Rice is one of the three major food crops in the world and more than 50% of the world's  
45 population as the staple food. In China, rice production and consumption play a leading role in food  
46 production. More than 65% of the population in China takes rice as the staple food, which is the  
47 cornerstone of China's food security. With the rapid development of modern chemical agriculture,  
48 global cadmium (Cd) pollution is becoming more and more serious[1]. A large amount of Cd enters  
49 to the farmland ecosystem, resulting in excessive Cd content in farmland soil. In recent years, the  
50 problem of heavy metal pollution of paddy soil and rice in China has become increasingly serious[2],  
51 among which Cd pollution is the most serious. It was studied that approximately  $1.3 \times 10^4$  ha of  
52 cultivated soil was contaminated by Cd and about  $5.0 \times 10^4$ t of Cd contaminated rice was produced  
53 every year[3]. The incidents of "cadmium rice" and "toxic rice" have occurred frequently, which has  
54 attracted extensive attention in the society[4]. Cd has strong biological mobility and is easily  
55 absorbed and accumulated by plants, which can be ingested into human body through soil-crop-food  
56 chain system, becoming the main source of Cd intake and causing potential harm to human health[5].  
57 Therefore, reducing the content of Cd in rice has become one of the effective ways to reduce the  
58 harm of Cd pollution to human health[6].

59 Cd is a non-essential element for rice growth, but it can be absorbed from the soil through the  
60 transport channel of essential mineral nutrient elements in rice roots[7], realize the distribution  
61 between aboveground stems and leaves through xylem loading and transportation, and further  
62 migrate to grains through phloem, and finally complete the accumulation in grains[8,9]. The  
63 absorption, transport and distribution of Cd by rice are related to varieties[10], soil types and pH

64 [11,12], irrigation methods[13,14], cultivation modes[15], etc. Positive progress has also been made  
65 in the research on the mechanisms of cadmium tolerance and the molecular mechanisms of Cd  
66 absorption and accumulation in rice[3, 16-18]. For example, *OsABCG36* enhances the tolerance of  
67 rice to Cd by expelling Cd from root cells[19]; The transporter *OsHMA3* can transport Cd into  
68 vacuoles, reducing the transport of Cd to aboveground, reducing the toxic effect of Cd[20]; Cd enters  
69 the vessels through transporters, and then transfers upward by transpiration and root pressure is the  
70 key to determine the accumulation of Cd in rice shoot and grain[21]; The transfer of Cd from  
71 vascular to DVB (Diffuse Vascular Bundles) is the key to the accumulation of Cd into grains.  
72 Selecting varieties with small DVB area in the first stem node is conducive to reducing the  
73 accumulation of Cd in brown rice[22]. Not exclusive to these studies have laid a good theoretical and  
74 technical foundation for the cultivation of rice varieties with high yield, high quality and low Cd  
75 accumulation, and the cultivation regulation of Cd absorption and accumulation in rice as well.

76 Temperature and light are two particularly important environmental factors for plant survival,  
77 growth and development[23]. Different temperature and light conditions affect rice growth period  
78 and material accumulation, thus affecting rice yield composition[24], grain quality[25], and the  
79 differential absorption and accumulation of Cd by rice[26] . Differences in Cd content of rice under  
80 different yield levels was also proved[27]. Different genotypes and in the same rice variety in  
81 different seasons and locations which considered an environmentally variable variety, suggested  
82 genotypic differences in Cd uptake and accumulation and possible gene-environment  
83 interactions[26]. It was suggested that temperature was the main factor caused the difference in Cd  
84 content of these environmentally variable varieties[28]. In addition, the Cd absorption of rice was

85 most sensitive to the temperature changes in tillering and grain filling stage, low temperature in the  
86 early growth stage and high temperature in the late growth stage could promote the accumulation of  
87 cadmium in rice grains[29], that's the reason why the content of Cd in grains and rachis of late rice is  
88 higher than that of early rice. However, the physiological mechanisms by which temperature affects  
89 Cd uptake and transport in rice were seldom reported. Additionally, light conditions affect the  
90 growth and development of rice and inevitably affect various physiological metabolic processes of  
91 Cd uptake, translocation and accumulation in rice under Cd contaminated conditions[30,31],  
92 although details of the ways in which light affects the uptake of Cd in rice and the related  
93 physiological metabolic mechanisms have not been reported.

94 The present work was carried out aiming to elucidate the uptake and accumulation of Cd in  
95 different types of rice varieties under different light and temperature conditions by setting different  
96 SDs, and the interrelationship between Cd uptake and accumulation and the expression of Cd uptake  
97 and translocation-related genes, so as to deepen the physiological mechanism of Cd uptake and  
98 accumulation in rice under temperature and light conditions, and provide a theoretical basis for the  
99 selection of rice varieties and their suitable sowing seasons in Cd-polluted areas of China, the  
100 determination of rice planting systems, and the effective regulation of Cd content in rice.

## 101 **2 Materials and Methods**

### 102 *2.1. Experimental varieties and field*

103 Two-line Early Hybrid Rice Luliangyou 996 (V1) and Zhuliangyou 819 (V2) were used in this  
104 study. V1 is the main variety of double cropping early rice in the middle and lower reaches of the  
105 Yangtze River, with an average growth period of 109.7 days (from sowing to harvesting) and

106 characteristics of relative high Cd accumulation. V2 is an emergency early rice variety with low Cd  
107 accumulation popularized in Hunan Province (light incidence areas of rice blast) with an average  
108 growth period of about 106.0 days. Field experiment was conducted in 2018 in Yonghe village,  
109 Yanxi Town, Liuyang City of Hunan Province (Comprehensive Teaching and Experimental Base of  
110 Hunan Agricultural University), the cadmium content (total cadmium) of experimental field soil was  
111  $0.47 \pm 0.07$ mg/kg, and soil pH was  $5.4 \pm 0.3$ . The experimental soil type was loam, and the basic  
112 soil nutrients were as follows: organic matter, 22.71g/kg; total nitrogen, 1.63 g/kg; total phosphorus,  
113 1.56g/kg; alkali hydrolyzable nitrogen, 133.51 mg/kg; available phosphorus, 38.59mg/kg; and  
114 available potassium, 134.26mg/kg.

## 115 *2.2. Experimental design*

116 Every 15 days from April 22, 2018, to July 6, 2018, totally six different SD treatments were set by  
117 strip-plot design with 2 repetitions in each variety, 24 plots were set with an area of 40m<sup>2</sup>(4m×10m)  
118 each. Separate water inlet and drainage ditches were set on both sides of every plot, and ridges were  
119 made among treatments covered with plastic film, the variety interval was 0.8m and the repetition  
120 interval was 0.4m.

## 121 *2.3. Cultivation and field management*

122 Exactly two of 25 days old seedlings were transplanted with specification of 20cm×20cm in each  
123 transplanting point. The fertilization program was as follows: the proportion of base fertilizer,  
124 applied 2 days before transplanting, and tiller fertilizer, applied 20 days after transplanting, was 6:4.  
125 180kg/hm<sup>2</sup> pure nitrogen (urea, nitrogen content is 46.4%), 90kg/hm<sup>2</sup> P<sub>2</sub>O<sub>5</sub> (calcium superphosphate,  
126 P<sub>2</sub>O<sub>5</sub> content is 12%, as base fertilizer), and 145kg/hm<sup>2</sup> K<sub>2</sub>O (potassium chloride, K<sub>2</sub>O content is

127 60%, as the base fertilizer: top-dressing fertilizer = 0.5:0.5) were applied in each treatment plot. Plant  
128 protection measures was uniformly managed according to local regulations, and there were no  
129 obvious diseases, pests, weeds and meteorological disasters during experimental period.

#### 130 *2.4. Soil and meteorological data acquisition*

131 The meteorological data were recorded once an hour by using the micro meteorological station  
132 (Vantage Pro 2, USA) installed in the field. The main meteorological indicators include air  
133 temperature (AT, °C), soil temperature (ST, °C), ultraviolet radiation (UR, MJ), photosynthetic  
134 radiation (PR, KW/m<sup>2</sup>), light intensity (I, Klux), sunshine hours (SH, h), soil pH, air CO<sub>2</sub>  
135 concentration (CO<sub>2</sub>, ppm), atmospheric pressure (AP, hpa), rainfall (RF, mm), etc.

#### 136 *2.5. Determination of Cd content in brown rice and Cd accumulation in plant*

137 Processing grains (each sample) into brown rice, and screened through a 100-mesh sieve after  
138 crushed with a stainless-steel crusher. Concentrated nitric acid and perchloric acid (V nitric acid: V  
139 Perchloric acid = 4:1) were used to wet digestion. The cadmium content of crushed samples was  
140 determined by atomic spectrophotometer (Graphite Furnace). Dry weight (DW, kg) and Cd Content  
141 (mg/kg) of root, leaf and stem, and spike of each variety were also determined for computing the Cd  
142 accumulation (Cd-A) by plant in the experimental condition with the formula as follows:

$$143 \quad \text{Cd-A (mg)} = \text{DW}_{\text{root}} \times \text{C}_{\text{Cd-root}} + \text{DW}_{\text{leaf-stem}} \times \text{C}_{\text{Cd-leaf-stem}} + \text{DW}_{\text{spike}} \times \text{C}_{\text{Cd-spike}}$$

#### 144 *2.6. Real-time PCR analysis*

145 Root and leaf samples were taken by liquid nitrogen at rice maturity and then stored in a -80°C  
146 refrigerator. Genes related to Cd uptake and transport e.g., *OsLCD*, *OsIRT1*, *OsIRT2*, *OsLCT1*,  
147 *OsNramp1*, *OsNramp5* and *OsHMA3*, expressed in root and genes *OsLCD*, *OsIRT1*, *OsIRT2* and

148 *OsLCT1* expressed in leaf were analyzed by using Real-time RT-PCR (the primer sequences used for  
149 qRT-PCR are shown in Table 1., Synthesis by Invitrogen, Beijing). The total RNA samples were  
150 isolated by TRIzol reagent (TIANGEN BIOTECH, Beijing). Then the RNA purity and concentration  
151 was measured by using the NanoPhotometer spectrophotometer (IMPLEN, CA, USA). After  
152 detecting, cDNA was synthesized using 2 µg RNA using the PrimeScript™ RT reagent Kit with  
153 gDNA Eraser (TaKaRa). Gene specific primers for quantitative real-time PCR (qRT-PCR) analysis  
154 were designed using Primer 5.0 by Allwegene Technology (Allwegene Technology Co., Ltd. Beijing,  
155 China). The *ACTIN* gene was used as internal reference gene. qRT-PCR reaction was performed  
156 using SYBR® Premix Ex Taq™ II (Tli RNaseH Plus) and was conducted on ABI 7500 Real-time  
157 Detection System (Thermo Fisher Scientific, USA). The PCR reaction was carried out with the  
158 following reaction conditions: 95°C for 30s; followed by 45 cycles of 95°C for 5s, 60°C for 40s.  
159 Samples for qRT-PCR were run in 3 biological replicates with 3 technical replicates and the data  
160 were represented as the mean ± SD (n = 3) for Student's t-test analysis. The relative gene expression  
161 was calculated using the  $2^{-\Delta\Delta CT}$  algorithm[32].

## 162 2.7. Statistical analysis

163 Excel 2010 was used for data processing and plotting, and SPSS 22.0 was used for descriptive  
164 statistics, independent sample t-test, single sample t-test, ANOVA, multiple comparison, Pearson  
165 correlation analysis, Partial correlation analysis, etc.

## 166 3 Results

### 167 3.1 Variations of temperature and light indicators under different SD treatments

168 Independent sample t-test results shown that all of average values of temperature and light



169 indicators monitored from two varieties shown no significant difference (Table 2.), indicated that the  
170 changes in the indicators of the two experimental varieties were consistent in response to the SD  
171 treatments. The differences of average temperatures (ST, AT), accumulative temperatures (SAT,  
172 AAT), and light factors (UR, PR, I, SH) among different SD treatments were due to the differences  
173 of stage and length of the FGP of each treatment. Temperature factors e.g., ST, AST, AT and AAT  
174 showed less variation among treatments with CVs of 4.23%-5.50% and 4.10%-5.95% for the two  
175 varieties respectively, while light factors e.g., UR, PR and I showed more variation among  
176 treatments with CVs of 14.08%-16.75% and 13.66%-16.80% for the two varieties respectively. In  
177 addition, the SH varied less across treatments, with an average CV of 6.58% for two varieties.

### 178 *3.2 Relative expression of genes related to Cd uptake and transport under different SDs*

179 As shown in Table 3., with the exception of *OsIRT2*, the relative expression variation of genes  
180 related to Cd uptake and translocation in roots and leaves at maturity stage under the SDs was  
181 consistent in the two rice varieties. The genes showing high variation(CV>36%) in relative  
182 expression in the root system under different SD treatments in both varieties were *OsIRT1*, *OsLCT1*,  
183 *OsNramp5* and *OsHMA3*; *OsIRT2* showed small variation in expression in both varieties (CV<15%);  
184 while *OsLCD* showed high variation in expression in V1 and moderate variation in V2  
185 (16%<CV<35%) and *OsNramp1* was moderately variable in V1 and highly variable in V2. In the  
186 leaves, *OsIRT1* showed high variation in both varieties, *OsLCD* and *OsIRT2* showed small variation  
187 in both varieties, but the relative expression of *OsLCT1* differed between the two varieties due to  
188 differences SD treatments, with high variation in V1 and moderate variation in V2.

189 Two-way ANOVA showed (Table 4. and Table 5.) that at maturity stage, the genes whose relative

190 expression did not differ among rice varieties but differed significantly among SD treatments were  
191 *OsLCT1* and *OsNramp5* in the roots and *OsLCD* in the leaves, respectively; while the genes whose  
192 relative expression differed significantly among varieties and among SD treatments were *OsLCD*,  
193 *OsIRT1*, *OsIRT2*, *OsNramp1* and *OsHMA3* in the roots, and *OsIRT1* and *OsIRT2* and *OsLCT1* in the  
194 leaves, respectively.

### 195 3.3 *CdBR under different SDs*

196 As shown in figure 1., average CdBR in Zhu Liangyou 819 (V2) was 0.372 mg/kg, higher than Lu  
197 Liangyou 996 (V1) of 0.333 mg/kg by 11.71%, but there was no significant difference in cadmium  
198 content of brown rice (CdBR) between two varieties under different SDs ( $p=0.278$ ). CdBR in two  
199 varieties presented significant differences ( $p < 0.05$ ) and high variances with the CV of 47.26% in  
200 V1 and 73.99% in V2 in different SD treatments, respectively. Similarly, S6 treatment was get more  
201 higher CdBR than other treatments in two varieties, while S4s were of the lowest; CdBR in S6 were  
202 2.82 and 8.48 times to S4 in V1 and V2, respectively. Interestingly, CdBR of S1 to S5 were lower  
203 than the criteria of CXS 193-1995 (0.4 mg/kg) [33] in V1, and S2 to S5 in V2. It was noteworthy that  
204 CdBR in S4 and S5 in V2 lower than the national standard of 0.2 mg/kg (Chinese National Standard  
205 GB 2762—2012).

### 206 3.4 *Correlation between temperature and light factors and relative expression of genes related to* 207 *Cd uptake and transport*

208 Table 3. showed that there were inter-varietal differences in the expression of *OsIRT2* in leaves  
209 under different SD treatments, hence Pearson correlation analyses between the relative expression of  
210 *OsIRT2*-leaf in each variety with temperature and light factors, respectively. However, the relative

211 expression of *OsIRT2* in the leaves of both varieties was significantly correlated with neither  
212 temperature nor light factors. Gene relative expressions in SDs with no inter-varietal differences  
213 were variety-integrated analyzed by Pearson correlation (Tabel 6.).The relative expression of *OsIRT1*  
214 in the root system was significantly positively correlated to ST, SAT, AT, AAT and SH, whereas the  
215 relative expression of *OsNramp5*, *OsNramp1* and *OsHMA3* in root were significantly negatively  
216 correlated with ST, SAT, AT, AAT and SH. Additionally, expression of *OsIRT1* in leaf was  
217 significantly negatively correlated to UR, PR, and I, while expression of *OsLCT1* in leaf was  
218 significantly positively correlated with ST, SAT, AT, and AAT.

### 219 3.5 Correlations between relative genes expression and Cd-A and Cd-BR

220 The correlations between Cd uptake and transport genes expression, Cd-A and CdBR were  
221 analyzed in groups according to whether there were varietal differences in gene expression in  
222 response to SDs (Table 7). Group 1 analyzed separately for those with varietal differences in gene  
223 expression in response to SDs, and Group 2 analyzed two rice varieties together for those without  
224 varietal differences. *OsIRT1* expressed in root of V1 was negatively significantly correlated to  
225 CdBR, while a positively significantly correlation between the expression of *OsHMA3* with CdBR;  
226 There were statistically significant correlations between the other genes expression in root or/and  
227 leaf neither with Cd-A, nor with CdBR. *OsLCD*, *OsNramp1*, and *OsHMA3* expressed in root of V2  
228 were positively significantly correlated to Cd-A and CdBR, while there were negatively significant  
229 correlations between *OsIRT1* in root and *OsLCT1* in leaf of V2 only with Cd-A. Additionally in  
230 Group 2, only the expression of *OsNramp5* in root shown negatively correlations with Cd-A and  
231 CdBR.

### 232 3.6 Partial correlations between temperature and light factors and Cd-A and CdBR

233 Based on the results in Tables 6. and Table 7., the correlations between temperature and light  
234 factors and Cd-A and CdBR were further analyzed by using partial correlation analysis (Table 8.).  
235 ST, SAT, AT, AAT, and SH were significantly negatively correlated to CdBR by positively  
236 regulating the expressions of *OsIRT1* and negatively regulating *OsHMA3* in root of V1; although  
237 UR, PR, and I significantly negatively correlated to the expression of *OsIRT1* in leaf of V1, there  
238 were statistically relationships between UR, PR, and I neither with Cd-A, nor with CdBR,  
239 respectively. Temperature factors were significant affected Cd-A but not CdBR in V2, nevertheless  
240 none by light factors either in Cd-A or in CdBR. ST, SAT, AT, and AAT were negatively correlated  
241 to Cd-A in V2 by positively regulating the expression of *OsIRT1* in root and *OsLCT1* in leaf, while  
242 negatively correlated to Cd-A by negatively regulating of *OsNramp1* and *OsHMA3* in root.  
243 Additionally, ST was significantly negatively correlated with CdBR both in V1 and V2 by  
244 negatively regulating the expression of *OsNramp5* in root.

## 245 **Discussion**

246 Cadmium pollution and the accumulation in rice, which then enters the human body through the food  
247 chain causes a potential threat to human health, is one of the major environmental problems all over  
248 the world[34]。 Exploring the transport process of Cd in rice and constructing cultivation and  
249 management measures to reduce the absorption and accumulation of Cd in rice will help to improve  
250 rice growth and grain quality[3,35]. The absorption and distribution of Cd from soil to rice is a  
251 dynamic process, which relies on the absorption of other metal ion transporters through roots[36,37],  
252 root-to-shoot transport (xylem transport)[38,39] and source-sink transport (including seed loading)

253 drive by phloem[40,41] to accomplish transportation and distribution among organs.

254 Since the climate e.g. precipitation, solar-radiation and air-temperature during growth period was  
255 different, the nutritional quality and yield potential were greatly different between early and late  
256 rice[42]. It was also proved that different water contents in paddy soils caused by different rainfall  
257 amount caused great variation in Cd accumulation in grains between early and later rice[26]. In this  
258 study, the mean number of days of field growth period (FGP) for the two varieties under different  
259 SDs was 83.0 and 83.2 days, with coefficients of variation of 0.76% and 1.68%, respectively (S1-  
260 sheet3), and shown the response of FGP to SDs was highly consistent between the two varieties ( $p =$   
261 0.787, independent samples t-test), indicating that the variation in each temperature (AT, ST, AAT,  
262 SAT) and light (UR, PR, SH, I) factor under different SDs was mainly due to the different position  
263 of FGP on the field trial timeline. Therefore, the different temperature and light conditions obtained  
264 by the SDs in present experiment were highly justified.

265 Temperature is considered to have a great correlation with cadmium absorption and accumulation  
266 in rice. Increasing temperature decreased the organic matter content rapidly and promoted metal  
267 availability and plant uptake[43]. It was believed that since the reduction in formation of iron plaque  
268 and decreased soil porewater pH, warming increased Cd accumulation in root to shoot, boosted Cd  
269 translocation from root to shoot, and influenced root morphology and increased leaf transpiration and  
270 boosted the xylem stream, subsequently significantly increased total uptake of Cd/Cu by rice[44]. In  
271 contrast to the present study, there was little difference in the AT during the FGP among different  
272 SDs, but the indexes related to temperature such as AAT, ST, AST etc., showed extremely  
273 significant negative correlations with CdBR. On the one hand, it was shown that temperature was

274 one of more sensitive factors affecting the CdBR; On the other hand, under S6 treatment, the average  
275 temperatures of the two varieties at maturing phase were 18.66°C and 20.97°C, respectively, the seed  
276 setting rate and yield under these two treatments were the lowest in both varieties (S1-sheet5), which  
277 may suggest that the filling rate were affected seriously, could be considered as that the organic-  
278 material-flow containing Cd was distributed to fewer grains, resulting in the significant increase of  
279 CdBR under these treatments.

280 The response of CdBR to SDs was consistent between the two varieties ( $p=0.278$ ), but the  
281 variation in CdBR was much higher in V2 than V1 under different SDs, indicating that the CdBR of  
282 V2 was more sensitive to the temperature and light environment. In addition, the CdBR of V1 was  
283 invariably greater than the national standard of 0.2 mg/kg at any SD, researchers treated it as a high  
284 Cd accumulating variety consequently, while V2 as a low Cd accumulating variety did not show low  
285 Cd content ( $<0.2$  mg/kg) at any environment/SD, and it could be not constantly feasible to be used as  
286 an emergency variety for low cadmium early rice in Hunan province. To obtain grains with V2  
287 below the national standard for CdBR, it would be more reasonable to use it as a single-season  
288 medium rice or/and early maturing late rice (transplanting period is about early July) in Hunan  
289 province.

290 The expression of seven genes in the root system and four genes in the leaves differed  
291 significantly under different SDs with different levels of responsiveness, which provides a theoretical  
292 possibility to regulate the expression of genes related to Cd uptake and transport through SD  
293 selection, and thus regulate the uptake and accumulation of Cd in rice, and the CdBR as well. For  
294 genes that did not differ in relative expression between rice varieties but differ significantly among

295 SDs, such as *OsLCT1* and *OsNramp5* in roots and *OsLCD* in leaves, such regulation could be more  
296 easily achieved by SD, while the regulation of genes that differ not only among SDs but also  
297 between varieties may be another complicated story.

298 Studies on the molecular mechanisms of Cd uptake and transport in rice have confirmed that the  
299 expression of a number of genes were associated with the accumulation and distribution of Cd in rice  
300 plants, and/or the Cd content of the rice grain as well, e.g. iron-regulated transporter *OsIRT1* have  
301 been proved to play some roles in Cd uptake in rice[45]; *OsNramp1* and *OsNramp5* were major  
302 transporters contribute to Cd transport in rice[18]; *OsHMA3* as a P1B-type of ATPase affected root-  
303 to-shoot cadmium translocation in rice by mediating efflux into vacuoles[46]; *OsLCT1* regulated  
304 cadmium transport into rice grain[47]. In this study, the expression of these genes mentioned above  
305 were verified that were regulated by temperature and light factors in both varieties (Table 6.); In the  
306 same way that the expression of *OsIRT1*, *OsNramp1*, *OsNramp5*, and *OsHMA3* in root of V1 and/or  
307 V2, and *OsLCT1* in leaf of V2, were significant correlated to CdBR and/or Cd-A (Table 7.),  
308 suggesting a definite relationship between temperature and light conditions and CdBR and Cd-A.

309 Partial correlation analysis is the process of removing the effect of the third variable when two  
310 variables are simultaneously correlated with a third variable, and analyzing only the degree of  
311 correlation between the other two variables, determined by the R-value of the correlation coefficient.  
312 Partial correlation analysis showed that the effect of temperature on the CdBR was the main factor in  
313 the different temperature and light conditions created by the SD settings. Limited the expression of  
314 *OsIRT1*, *OsNramp1*, and *OsNramp5* contributed to the reduction of cadmium content in brown  
315 rice[30,48], and the partial correlation between temperature and CdBR also indicated that increased

316 temperature contributed to the reduction of Cd in V1 and/or V2. Nevertheless, in low Cd-  
317 accumulating cultivars, *OsHMA3* functions to sequester Cd to the root vacuoles, resulting in less Cd  
318 translocation from the roots to the shoots and grains, while in high Cd-accumulating cultivars, loss of  
319 function of *OsHMA3* resulted in high root-to-shoot translocation of Cd[49]. The down-regulation of  
320 *OsMHA3* expression by increased temperature may have led to an increase CdBR in V1 and Cd-A  
321 in V2, but had no significant enhanced CdBR in V2, further confirmed that the increase in CdBR  
322 was mainly executed by the transport capacity of Cd in the phloem[50].

## 323 **Conclusion**

324 Temperature and light conditions during rice FGP could be adjusted by SD. Different temperature  
325 and light conditions showed different expression levels of genes related to Cd uptake and transport in  
326 rice, thus affected Cd-A and CdBR. Increased in ST, SAT, AT and AAT down-regulated *OsIRT1*,  
327 *OsNramp1* and *OsNramp5* to reduce Cd-A and CdBR. In the double-season rice growing area of  
328 Hunan, Zhuliangyou 819 was grown as a single-season medium rice or early maturing late rice could  
329 limit the Cd content of brown rice to below the national safety standard level.

330

331 **Supplementary Materials:** S1: sheet1, hourly temperature detected by the micro meteorological  
332 station (Vantage Pro 2, USA) installed in the field from 17 May to 22 October 2018; sheet2, daily  
333 average temperature; sheet3, major growth stages and their number of days for the two experimental  
334 varieties; sheet4, daily air and soil temperature and light factor indicators measured from 5 May to  
335 20 October 2018; sheet5, theoretical yields of the two experimental varieties and their yield  
336 components under different SD treatments; sheet6, relative expression of seven Cd uptake and



337 translocation-related genes in roots of two rice varieties under different SD treatments at maturity  
338 stage; sheet7, relative expression of four Cd uptake and translocation-related genes in leaves of two  
339 rice varieties under different SD treatments at maturity.

340 **Acknowledgements:** Natural Science Foundation of Hunan Province (2019JJ40124) is thanked for  
341 the financial support; Hunan Rice Research Institute (HRRI) is thanked for providing the seeds.

342 Author Contributions

343 **Author Contributions:** Data curation, Huan Xiao, Qiaomao Chen and Yu Kuang; Formal analysis,  
344 Qiaomao Chen and Yu Kuang; Resources, Huan Xiao and Hejun Ao; Supervision, Xuehua Wang;  
345 Writing – original draft, Zhongwen Rang; Writing – review & editing, Zhongwen Rang, Zhenxie Yi,  
346 Xuehua Wang and Hejun Ao.

347 **Conflicts of Interest:** The authors confirmed that there was no conflict of interests.

## 348 **References**

- 349 1. Adriano, DC. Lead, Mercury, Cadmium and Arsenic in the Environment. *J. Environ. Qual.* **1988**, 17(1):171.
- 350 2. Qin G, Niu Z, Yu J, Li Z, Ma J, Xiang P. Soil heavy metal pollution and food safety in China: Effects,  
351 sources and removing technology. *Chemosphere* 2021, 267:129205.
- 352 3. Sebastian A, Prasad MNV. Cadmium minimization in rice. A review. *Agron. Sustain. Dev.* 2014, 34(1):155-  
353 173.
- 354 4. Zou M, Zhou S, Zhou Y, Jia Z, Guo T, Wang J. Cadmium pollution of soil-rice ecosystems in rice cultivation  
355 dominated regions in China: A review. *Environ. Pollut.* 2021, 280(3):116965.
- 356 5. Moulis JM, Thévenod F. New perspectives in cadmium toxicity: An introduction. *BioMetals* 2010,  
357 23(5):763-768.

- 358 6. Clemens S, Aarts MGM, Thomine S, Verbruggen N. Plant science: The key to preventing slow cadmium  
359 poisoning. *Trends Plant Sci.* 2013.
- 360 7. Clemens S, Palmgren MG, Krämer U. A long way ahead: Understanding and engineering plant metal  
361 accumulation. *Trends Plant Sci.* 2002, 18(2):92-99.
- 362 8. Uraguchi S, Fujiwara T. Cadmium transport and tolerance in rice: Perspectives for reducing grain cadmium  
363 accumulation. *Rice* **2012**, 5(1):5.
- 364 9. Uraguchi S, Mori S, Kuramata M, Kawasaki A, Arao T, Ishikawa S. Root-to-shoot Cd translocation via the  
365 xylem is the major process determining shoot and grain cadmium accumulation in rice. *J. Exp. Bot.* **2009**,  
366 60(9):2677.
- 367 10. Liu J, Li K, Xu J, Liang J, Lu X, Yang J, et al. Interaction of Cd and five mineral nutrients for uptake and  
368 accumulation in different rice cultivars and genotypes. *F. Crop. Res.* **2003**, 83(3):271-281.
- 369 11. Ye X, Ma Y, Sun B. Influence of soil type and genotype on Cd bioavailability and uptake by rice and  
370 implications for food safety. *J. Environ. Sci. (China)* **2012**, doi:10.1016/S1001-0742(11)60982-0.
- 371 12. Bourennane H, Nicoullaud B, Couturier A, King D. Exploring the spatial relationships between some soil  
372 properties and wheat yields in two soil types. *Precis. Agric.* **2004**, 5(5):521-536.
- 373 13. Spanu A, Valente M, Langasco I, Barracu F, Orlandoni AM, Sanna G. Sprinkler irrigation is effective in  
374 reducing cadmium concentration in rice (*Oryza sativa* L.) grain: A new twist on an old tale? *Sci. Total*  
375 *Environ.* **2018**, 628:150-160.
- 376 14. Tian T, Zhou H, Gu J, Jia R, Li H, Wang Q, et al. Cadmium accumulation and bioavailability in paddy soil  
377 under different water regimes for different growth stages of rice (*Oryza sativa* L.). *Plant Soil* **2019**, 440:327–  
378 339.

- 379 15. Farooq MU, Zhu J. The paradox in accumulation behavior of cadmium and selenium at different planting  
380 times in rice. *Environ. Sci. Pollut. Res.* **2019**, 26(22):22421.
- 381 16. Ueno D, Kono I, Yokosho K, Ando T, Yano M, Ma JF. A major quantitative trait locus controlling cadmium  
382 translocation in rice (*Oryza sativa*). *New Phytol.* **2009**, 182(3):644-653.
- 383 17. Ishikawa S, Ae N, Yano M. Chromosomal regions with quantitative trait loci controlling cadmium  
384 concentration in brown rice (*Oryza sativa*). *New Phytol.* **2005**, 168(2):345-350.
- 385 18. Ishimaru Y, Takahashi R, Bashir K, Shimo H, Senoura T, Sugimoto K, et al. Characterizing the role of rice  
386 NRAMP5 in Manganese, Iron and Cadmium Transport. *Sci. Rep.* **2012**, 2(6071):286.
- 387 19. Fu S, Lu Y, Zhang X, Yang G, Chao D, Wang Z, et al. The ABC transporter ABCG36 is required for  
388 cadmium tolerance in rice. *J. Exp. Bot.* **2019**, 70(20): 5909–5918.
- 389 20. Miyadate H, Adachi S, Hiraizumi A, Tezuka K, Nakazawa N, Kawamoto T, et al. OsHMA3, a P1B-type of  
390 ATPase affects root-to-shoot cadmium translocation in rice by mediating efflux into vacuoles. *New Phytol.*  
391 **2011**, 189(1):190-199.
- 392 21. Fujimaki S, Suzui N, Ishioka NS, Kawachi N, Ito S, Chino M, et al. Tracing cadmium from culture to spikelet:  
393 Noninvasive imaging and quantitative characterization of absorption, transport, and accumulation of  
394 cadmium in an intact rice plant. *Plant Physiol.* **2010**, 152(4):1796-1806.
- 395 22. Yamaguchi N, Ishikawa S, Abe T, Baba K, Arao T, Terada Y. Role of the node in controlling traffic of  
396 cadmium, zinc, and manganese in rice. *J. Exp. Bot.* **2012**, 63(7):2729-2737.
- 397 23. Li H, Liang Z, Ding G, Shi L, Xu F, Cai H. A natural light/dark cycle regulation of carbon-nitrogen  
398 metabolism and gene expression in rice shoots. *Front. Plant Sci.* **2016**, 7(20130011).
- 399 24. Ding Y, Wang W, Zhuang Q, Luo Y. Adaptation of paddy rice in China to climate change: The effects of

- 400 shifting sowing date on yield and irrigation water requirement. *Agric. Water Manag.* **2020**, 228:105890.
- 401 25. Chen C, Huang J, Zhu L, Shah F, Nie L, Cui K, et al. Varietal difference in the response of rice chalkiness to  
402 temperature during ripening phase across different sowing dates. *F. Crop. Res.* **2013**, 151:85-91.
- 403 26. Liu Y, Zhang C, Zhao Y, Sun S, Liu Z. Effects of growing seasons and genotypes on the accumulation of  
404 cadmium and mineral nutrients in rice grown in cadmium contaminated soil. *Sci. Total Environ.* **2017**,  
405 doi:10.1016/j.scitotenv.2016.11.115.
- 406 27. He JY, Zhu C, Ren YF, Yan YP, Cheng C, Jiang DA, et al. Uptake, Subcellular Distribution, and Chemical  
407 Forms of Cadmium in Wild-Type and Mutant Rice. *Pedosphere* **2008**, 18(3).
- 408 28. Shi LL, Shen MX, Wu HJ, Lu CY, Mei LJ, Zhu XL, et al. Using sowing date management to promote  
409 micronutrient quality and alleviate cadmium accumulation in rice grains. *Cereal Res. Commun.* **2020**,  
410 48:575–583.
- 411 29. Fangmin C, Ningchun Z, Haiming X, Yi L, Wenfang Z, Zhiwei Z, et al. Cadmium and lead contamination in  
412 japonica rice grains and its variation among the different locations in southeast China. *Sci. Total Environ.*  
413 **2006**, 359(1-3):156-166.
- 414 30. Zhang J, Sun W, Li Z, Liang Y, Song A. Cadmium fate and tolerance in rice cultivars. *Agron. Sustain. Dev.*  
415 **2009**, 29(3):483-490.
- 416 31. Chen H, Li QP, Zeng YL, Deng F, Ren WJ. Effect of different shading materials on grain yield and quality of  
417 rice. *Sci. Rep.* **2019**, 9(1):1-9.
- 418 32. Pfaffl MW. A new mathematical model for relative quantification in real-time RT–PCR. *Nucleic Acids Res.*  
419 **2001**, 29(9):e45.
- 420 33. WHO/FAO Codex general standard for contaminants and toxins in food and feed. *Codex Stand.* **1995**.

- 421 34. Clemens S, Ma JF. Toxic Heavy Metal and Metalloid Accumulation in Crop Plants and Foods. *Annu. Rev.*  
422 *Plant Biol.* 2016, 67(1):489.
- 423 35. Li H, Luo N, Li YW, Cai QY, Li HY, Mo CH, et al. Cadmium in rice: Transport mechanisms, influencing  
424 factors, and minimizing measures. *Environ. Pollut.* 2017, 224(May):622-630.
- 425 36. Takahashi R, Ishimaru Y, Senoura T, Shimo H, Ishikawa S, Arao T, et al. The OsNRAMP1 iron transporter  
426 is involved in Cd accumulation in rice. *J. Exp. Bot.* **2011**, 62(14):4843-4850.
- 427 37. Sasaki A, Yamaji N, Yokosho K, Ma JF. Nramp5 is a major transporter responsible for manganese and  
428 cadmium uptake in rice. *Plant Cell* **2012**, 24(5):2155-2167.
- 429 38. Satoh-Nagasawa N, Mori M, Nakazawa N, Kawamoto T, Nagato Y, Sakurai K, et al. Mutations in rice (*Oryza*  
430 *sativa*) heavy metal ATPase 2 (OsHMA2) restrict the translocation of zinc and cadmium. *Plant Cell Physiol.*  
431 **2012**, 53(1):213-224.
- 432 39. Zhao FJ, Huang XY. Cadmium Phytoremediation: Call Rice CAL1. *Mol. Plant* 2018, 11(5):3.
- 433 40. Tanaka K, Fujimaki S, Fujiwara T, Yoneyama T, Hayashi H. Quantitative estimation of the contribution of  
434 the phloem in cadmium transport to grains in rice plants (*Oryza sativa* L.). *Soil Sci. Plant Nutr.* **2007**,  
435 53(1):72-77.
- 436 41. Fujimaki S, Suzui N, Ishioka NS, Kawachi N, Ito S, Chino M, et al. Tracing cadmium from culture to spikelet:  
437 Noninvasive imaging and quantitative characterization of absorption, transport, and accumulation of  
438 cadmium in an intact rice plant. *Plant Physiol.* **2010**, 152(4):1796-1806.
- 439 42. Xie Z, Tu S, Shah F, Xu C, Chen J, Han D, et al. Substitution of fertilizer-N by green manure improves the  
440 sustainability of yield in double-rice cropping system in south China. *F. Crop. Res.* **2016**, 188:142-149.
- 441 43. Antoniadis V, Alloway BJ. Availability of Cd, Ni and Zn to ryegrass in sewage sludge-treated soils at

- 442 different temperatures. *Water. Air. Soil Pollut.* **2001**, 132(3-4):201-214.
- 443 44. Ge LQ, Cang L, Liu H, Zhou DM. Effects of warming on uptake and translocation of cadmium (Cd) and  
444 copper (Cu) in a contaminated soil-rice system under Free Air Temperature Increase (FATI). *Chemosphere*  
445 **2016**, 155(July):1-82.
- 446 45. Uraguchi S, Kamiya T, Clemens S, Fujiwara T. Characterization of OsLCT1, a cadmium transporter from  
447 indica rice (*Oryza sativa*). *Physiol. Plant.* **2014**, 151(3).
- 448 46. Miyadate H, Adachi S, Hiraizumi A, Tezuka K, Nakazawa N, Kawamoto T, et al. OsHMA3, a P1B-type of  
449 ATPase affects root-to-shoot cadmium translocation in rice by mediating efflux into vacuoles. *New Phytol.*  
450 **2011**, 189(1):190-199.
- 451 47. Uraguchi S, Kamiya T, Sakamoto T, Kasai K, Sato Y, Nagamura Y, et al. Low-affinity cation transporter  
452 (OsLCT1) regulates cadmium transport into rice grains. *Proc. Natl. Acad. Sci. U. S. A.* **2011**, 108(52):20959-  
453 20964.
- 454 48. Wang W, Yamaji N, Ma JF. Molecular Mechanism of Cadmium Accumulation in Rice. In; 2019.
- 455 49. Sasaki A, Yamaji N, Ma JF. Overexpression of OsHMA3 enhances Cd tolerance and expression of Zn  
456 transporter genes in rice. *J. Exp. Bot.* **2014**, 65(20):6013-6021.
- 457 50. Kato M, Ishikawa S, Inagaki K, Chiba K, Hayashi H, Yanagisawa S, et al. Possible chemical forms of  
458 cadmium and varietal differences in cadmium concentrations in the phloem sap of rice plants (*Oryza sativa*  
459 L.). *Soil Sci. Plant Nutr.* **2010**, 56(6):839-847.

460 Table 1. Target gene primer sequences for Real Time PCR analysis.

| Gene name       | Forward primers/Reverse Primers | Primer sequences (5' to 3') | Product size (bp) |
|-----------------|---------------------------------|-----------------------------|-------------------|
| <i>OsLCD</i>    | F                               | TTACCACCAATGTTACAGCA        | 181               |
|                 | R                               | ACCACCCATCTATCAGTTTA        |                   |
| <i>OsIRT1</i>   | F                               | CACCTACTACAACCGCAGCA        | 238               |
|                 | R                               | GCCGATCACCACCGAGT           |                   |
| <i>OsIRT2</i>   | F                               | GGCCGGTAACACCACCAA          | 96                |
|                 | R                               | AGCCCGATCACCCTGAGTG         |                   |
| <i>OsLCT1</i>   | F                               | TAGCCACAACGAGACGCA          | 211               |
|                 | R                               | CGGTCGCATGGTCAGGTA          |                   |
| <i>OsNramp5</i> | F                               | TCTCGTGGTTCCTGGGTCT         | 185               |
|                 | R                               | GGAGTCCTTCCTGATGGTGA        |                   |
| <i>OsNramp1</i> | F                               | AAGGAAACTGGAGGTTGTGGT       | 127               |
|                 | R                               | ACTGAGCCTGGGGATGAATAA       |                   |
| <i>OsHMA3</i>   | F                               | TCCAAATCCATCCAACCAA         | 105               |
|                 | R                               | GTTCCCAATGTAGATGTGCTTT      |                   |
| <i>ACTIN</i>    | F                               | AAATGGAGACTGCCAAGACC        | 124               |
|                 | R                               | ATGAAGGAAGGCTGGAAGAG        |                   |

461  
462  
463  
464  
465  
466  
467  
468  
469

470 Table 2. Characterization of indicators related to temperature and light factors under different SD treatments. V, indicates variety, V1, Lu Liangyou996, V2, Zhu  
 471 Liangyou 819; T, indicates different sowing treatments; S1–S6 indicates the different treatments in the specific sowing date (SD); ST, soil daily average temperature  
 472 during field growth period(FGP); AST, soil accumulated temperate; AT, daily average air temperature; AAT, accumulated air temperature; UR, accumulative of  
 473 daily ultraviolet radiation in FGP; PR, accumulative daily photosynthetic radiation in FGP; I, accumulative daily illuminance in FGP; SH, accumulative sunshine  
 474 hours in FGP; St. D means the standard deviation; CV (%) indicates the Coefficient of variation; Cohen’s d indicates the T–value of the independent sample t–test,  
 475 and Sig. indicates the two–tail significance at 5% level.

| V  | Statistical Value | T     | ST /°C        | AST /°C       | AT /°C        | AAT /°C       | UR /MJ        | PR kW/m <sup>2</sup> | I /Klux       | SH /h         |        |
|----|-------------------|-------|---------------|---------------|---------------|---------------|---------------|----------------------|---------------|---------------|--------|
| V1 |                   | S1    | 28.16         | 2365.20       | 26.98         | 2293.37       | 8.00          | 1312.35              | 4461.53       | 776.70        |        |
|    |                   | S2    | 28.47         | 2362.91       | 27.46         | 2306.58       | 8.78          | 1402.33              | 4605.51       | 778.50        |        |
|    |                   | S3    | 28.97         | 2404.63       | 28.14         | 2363.79       | 10.18         | 1562.60              | 5181.88       | 777.60        |        |
|    |                   | S4    | 28.72         | 2383.40       | 27.82         | 2337.18       | 11.88         | 1767.25              | 6147.00       | 752.30        |        |
|    |                   | S5    | 27.70         | 2299.03       | 26.54         | 2229.09       | 12.40         | 1898.61              | 6679.64       | 728.70        |        |
|    |                   | S6    | 25.72         | 2109.14       | 24.37         | 2022.65       | 11.13         | 1736.59              | 6160.88       | 655.80        |        |
|    |                   | Mean  |               | 27.96         | 2320.72       | 26.89         | 2258.78       | 10.40                | 1613.29       | 5539.41       | 744.93 |
|    |                   | St. D |               | 1.18          | 109.51        | 1.36          | 124.33        | 1.74                 | 227.14        | 918.40        | 47.89  |
|    | CV (%)            |       | <b>4.23%</b>  | <b>4.72%</b>  | <b>5.05%</b>  | <b>5.50%</b>  | <b>16.75%</b> | <b>14.08%</b>        | <b>16.58%</b> | <b>6.43%</b>  |        |
| V2 |                   | S1    | 28.17         | 2394.23       | 27.00         | 2322.23       | 8.10          | 1326.26              | 4458.52       | 783.70        |        |
|    |                   | S2    | 28.47         | 2391.68       | 27.47         | 2334.63       | 8.85          | 1415.11              | 4590.30       | 786.30        |        |
|    |                   | S3    | 28.97         | 2404.63       | 28.14         | 2363.79       | 10.18         | 1562.60              | 5181.88       | 777.60        |        |
|    |                   | S4    | 28.72         | 2383.40       | 27.82         | 2337.18       | 11.88         | 1767.25              | 6147.00       | 752.30        |        |
|    |                   | S5    | 27.70         | 2299.03       | 26.54         | 2229.09       | 12.40         | 1898.61              | 6679.64       | 728.70        |        |
|    |                   | S6    | 25.81         | 2090.67       | 24.47         | 2006.95       | 11.13         | 1734.90              | 6229.87       | 655.20        |        |
|    |                   | Mean  |               | 27.97         | 2327.27       | 26.91         | 2265.65       | 10.42                | 1617.46       | 5547.87       | 747.30 |
|    |                   | St. D |               | 1.15          | 122.10        | 1.32          | 134.89        | 1.70                 | 220.92        | 931.94        | 50.23  |
|    | CV (%)            |       | <b>4.10%</b>  | <b>5.25%</b>  | <b>4.92%</b>  | <b>5.95%</b>  | <b>16.32%</b> | <b>13.66%</b>        | <b>16.80%</b> | <b>6.72%</b>  |        |
|    | Cohen's d         |       | <b>-0.028</b> | <b>-0.092</b> | <b>-0.025</b> | <b>-0.098</b> | <b>-0.029</b> | <b>-0.032</b>        | <b>-0.016</b> | <b>-0.084</b> |        |
|    | Sig.              |       | <b>0.978</b>  | <b>0.929</b>  | <b>0.981</b>  | <b>0.924</b>  | <b>0.978</b>  | <b>0.975</b>         | <b>0.988</b>  | <b>0.935</b>  |        |

476



477 Table 3. Relative expression of genes related to Cd uptake and transport at maturity stage in two rice varieties under different SD treatments.

| V                | T             | Root          |               |               |               |                 |                 |               | Leaf          |               |               |               |
|------------------|---------------|---------------|---------------|---------------|---------------|-----------------|-----------------|---------------|---------------|---------------|---------------|---------------|
|                  |               | <i>OsLCD</i>  | <i>OsIRT1</i> | <i>OsIRT2</i> | <i>OsLCT1</i> | <i>OsNramp5</i> | <i>OsNramp1</i> | <i>OsHMA3</i> | <i>OsLCD</i>  | <i>OsIRT1</i> | <i>OsIRT2</i> | <i>OsLCT1</i> |
| V1               | S1            | 1.00±0.08     | 1.00±0.07     | 1.00±0.07     | 1.00±0.07     | 1.00±0.03       | 1.00±0.11       | 1.00±0.02     | 1.00±0.12     | 1.00±0.09     | 1.00±0.07     | 1.00±0.12     |
|                  | S2            | 0.80±0.06     | 4.02±0.10     | 0.92±0.08     | 2.69±0.17     | 1.31±0.08       | 1.37±0.06       | 1.01±0.07     | 1.03±0.01     | 0.88±0.01     | 1.28±0.01     | 0.75±0.05     |
|                  | S3            | 0.42±0.04     | 1.24±0.05     | 0.77±0.08     | 0.89±0.02     | 1.08±0.04       | 0.53±0.02       | 0.36±0.01     | 0.96±0.04     | 0.56±0.02     | 1.21±0.07     | 1.82±0.07     |
|                  | S4            | 0.58±0.07     | 1.98±0.06     | 1.10±0.01     | 0.71±0.03     | 0.44±0.02       | 0.90±0.10       | 0.87±0.01     | 0.81±0.04     | 0.51±0.04     | 1.09±0.08     | 0.85±0.04     |
|                  | S5            | 1.19±0.03     | 1.40±0.10     | 0.94±0.03     | 2.39±0.10     | 1.80±0.01       | 1.55±0.16       | 1.52±0.02     | 1.14±0.12     | 0.49±0.06     | 1.09±0.14     | 0.98±0.05     |
|                  | S6            | 0.70±0.05     | 0.44±0.03     | 0.94±0.09     | 0.75±0.01     | 1.72±0.13       | 1.35±0.11       | 1.53±0.12     | 0.98±0.11     | 0.43±0.03     | 1.18±0.06     | 0.49±0.02     |
|                  | <b>Mean</b>   | 0.78          | 1.68          | 0.94          | 1.41          | 1.22            | 1.12            | 1.05          | 0.99          | 0.65          | 1.14          | 0.98          |
| <b>St.D</b>      | 0.28          | 1.25          | 0.11          | 0.89          | 0.50          | 0.38            | 0.44            | 0.11          | 0.23          | 0.10          | 0.45          |               |
| <b>CV</b>        | <b>35.55%</b> | <b>74.44%</b> | <b>11.26%</b> | <b>63.35%</b> | <b>41.14%</b> | <b>33.91%</b>   | <b>42.13%</b>   | <b>10.91%</b> | <b>36.27%</b> | <b>8.79%</b>  | <b>46.00%</b> |               |
| V2               | S1            | 0.67±0.07     | 1.14±0.08     | 1.00±0.04     | 1.36±0.16     | 1.26±0.05       | 1.32±0.04       | 1.32±0.04     | 1.16±0.08     | 1.30±0.18     | 1.26±0.13     | 1.52±0.16     |
|                  | S2            | 0.45±0.04     | 2.56±0.02     | 1.09±0.07     | 2.63±0.39     | 0.84±0.06       | 0.79±0.04       | 0.72±0.03     | 0.84±0.03     | 0.55±0.03     | 1.21±0.09     | 0.78±0.02     |
|                  | S3            | 0.52±0.04     | 2.34±0.01     | 0.80±0.06     | 1.59±0.27     | 0.83±0.00       | 0.48±0.02       | 0.41±0.03     | 1.01±0.01     | 0.50±0.01     | 1.30±0.11     | 1.15±0.03     |
|                  | S4            | 0.49±0.01     | 1.55±0.06     | 1.07±0.06     | 0.73±0.09     | 0.80±0.04       | 0.45±0.02       | 0.39±0.02     | 0.93±0.02     | 0.64±0.05     | 1.38±0.03     | 1.14±0.08     |
|                  | S5            | 0.69±0.09     | 0.62±0.03     | 0.95±0.03     | 0.78±0.06     | 1.46±0.05       | 1.43±0.12       | 1.26±0.09     | 1.00±0.02     | 0.59±0.05     | 1.15±0.02     | 1.08±0.05     |
|                  | S6            | 0.80±0.01     | 0.28±0.02     | 1.07±0.06     | 0.75±0.04     | 2.10±0.14       | 1.69±0.11       | 1.60±0.13     | 1.01±0.06     | 0.63±0.02     | 1.43±0.04     | 0.69±0.03     |
|                  | <b>Mean</b>   | 0.61          | 1.41          | 1.00          | 1.31          | 1.21            | 1.02            | 0.95          | 0.99          | 0.70          | 1.29          | 1.06          |
| <b>St.D</b>      | 0.14          | 0.91          | 0.11          | 0.74          | 0.51          | 0.53            | 0.51            | 0.11          | 0.30          | 0.11          | 0.30          |               |
| <b>CV</b>        | <b>22.60%</b> | <b>64.61%</b> | <b>10.96%</b> | <b>56.79%</b> | <b>41.93%</b> | <b>51.34%</b>   | <b>53.99%</b>   | <b>10.62%</b> | <b>42.67%</b> | <b>8.24%</b>  | <b>27.98%</b> |               |
| <b>Cohen's d</b> | <b>1.402</b>  | <b>0.423</b>  | <b>-0.855</b> | <b>0.207</b>  | <b>0.034</b>  | <b>0.344</b>    | <b>0.345</b>    | <b>-0.081</b> | <b>-0.346</b> | <b>-2.512</b> | <b>-0.355</b> |               |
| <b>Sig.</b>      | <b>0.191</b>  | <b>0.681</b>  | <b>0.413</b>  | <b>0.840</b>  | <b>0.973</b>  | <b>0.738</b>    | <b>0.737</b>    | <b>0.937</b>  | <b>0.736</b>  | <b>0.031</b>  | <b>0.727</b>  |               |

478 Table 4. Two-way ANOVA for relative expression of genes related to Cd uptake and transport in the roots of two rice varieties at maturity stage under different SD  
479 treatments

| Sources of error/genes | <i>OsLCD</i> |      | <i>OsIRT1</i> |      | <i>OsIRT2</i> |      | <i>OsLCT1</i> |             | <i>OsNramp5</i> |             | <i>OsNramp1</i> |      | <i>OsHMA3</i> |      |
|------------------------|--------------|------|---------------|------|---------------|------|---------------|-------------|-----------------|-------------|-----------------|------|---------------|------|
|                        | F            | P    | F             | P    | F             | P    | F             | P           | F               | P           | F               | P    | F             | P    |
| V                      | 114.35       | 0.00 | 142.82        | 0.00 | 6.10          | 0.02 | 3.44          | <b>0.08</b> | 0.20            | <b>0.66</b> | 12.26           | 0.02 | 20.36         | 0.00 |
| T                      | 78.36        | 0.00 | 1337.52       | 0.00 | 14.78         | 0.00 | 139.81        | <b>0.00</b> | 295.24          | <b>0.00</b> | 166.20          | 0.00 | 313.15        | 0.00 |
| V×T                    | 37.67        | 0.00 | 248.68        | 0.00 | 2.24          | 0.08 | 42.47         | 0.00        | 49.74           | 0.00        | 34.55           | 0.00 | 32.68         | 0.00 |

480 Table 5. Two-way ANOVA of leaf relative expression of genes related to Cd transport at maturity stage in two rice varieties under different sowing treatments

| Sources of error/genes | <i>OsLCD</i> |             | <i>OsIRT1</i> |      | <i>OsIRT2</i> |      | <i>OsLCT1</i> |      |
|------------------------|--------------|-------------|---------------|------|---------------|------|---------------|------|
|                        | F            | P           | F             | P    | F             | P    | F             | P    |
| V                      | 0.01         | <b>0.91</b> | 6.12          | 0.02 | 27.25         | 0.00 | 9.75          | 0.01 |
| T                      | 7.53         | <b>0.00</b> | 83.01         | 0.00 | 4.45          | 0.01 | 110.42        | 0.00 |
| V×T                    | 5.72         | 0.01        | 17.50         | 0.00 | 4.09          | 0.01 | 43.54         | 0.00 |

481  
482

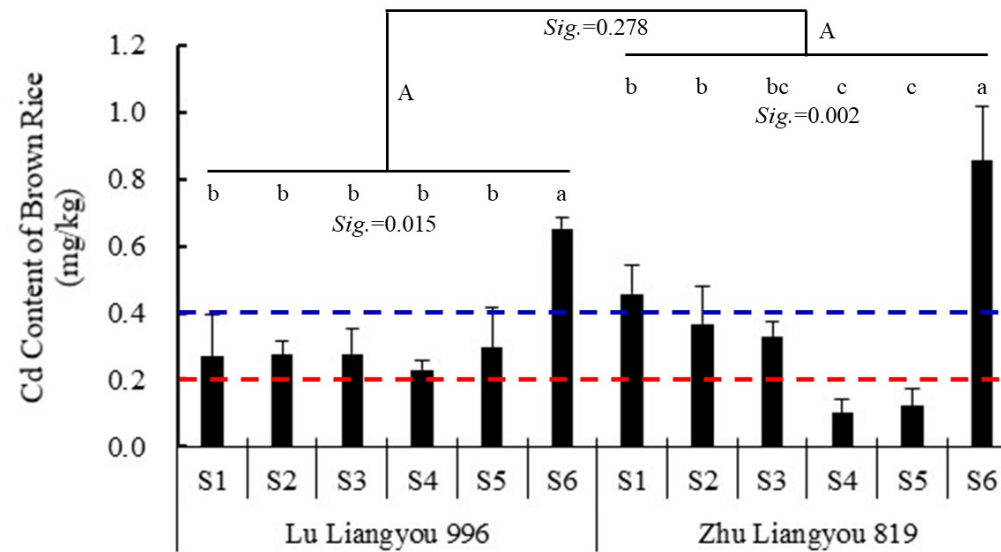

483

484 Figure 1. Cd content of brown rice in different sowing date treatments in Luliangyou 996 and Zhu Liangyou 819. Bars indicate  $\pm$ St.D; Capital letters indicate  
485 significance between varieties and lowercase letters among different treatments at the level of 5% by using LSD. The blue and red dotted lines indicate the national  
486 standard (0.2mg/kg) and the international limit standard (0.4mg/kg) of cadmium content in brown rice, respectively.

487 Table 6. Correlation between temperature and light factors and relative expression of genes related to Cd uptake and transport. “-Leaf” means the expression of  
 488 genes in the leaf; \* indicate significant difference at the level of 0.05%, and \*\* at 0.01%.

| Genes                  | ST              | SAT             | AT              | AAT             | UR              | PR             | I              | SH              |
|------------------------|-----------------|-----------------|-----------------|-----------------|-----------------|----------------|----------------|-----------------|
| <i>OsLCD</i>           | -0.387          | -0.341          | -0.422          | -0.383          | 0.045           | 0.119          | 0.187          | -0.276          |
| <i>OsIRT1</i>          | <b>0.613*</b>   | <b>0.576*</b>   | <b>0.617*</b>   | <b>0.591*</b>   | -0.350          | -0.401         | -0.482         | <b>0.627*</b>   |
| <i>OsIRT2</i>          | -0.224          | -0.179          | -0.237          | -0.198          | 0.064           | 0.068          | 0.127          | -0.197          |
| <i>OsLCT1</i>          | 0.273           | 0.305           | 0.258           | 0.289           | -0.360          | -0.342         | -0.400         | 0.423           |
| <i>OsNramp5</i>        | <b>-0.821**</b> | <b>-0.807**</b> | <b>-0.828**</b> | <b>-0.824**</b> | 0.213           | 0.312          | 0.379          | <b>-0.726**</b> |
| <i>OsNramp1</i>        | <b>-0.724**</b> | <b>-0.670*</b>  | <b>-0.750**</b> | <b>-0.708*</b>  | 0.122           | 0.221          | 0.301          | <b>-0.582*</b>  |
| <i>OsHMA3</i>          | <b>-0.814**</b> | <b>-0.739**</b> | <b>-0.839**</b> | <b>-0.780**</b> | 0.149           | 0.250          | 0.344          | <b>-0.669*</b>  |
| <i>OsLCD</i> -leaf     | -0.212          | -0.139          | -0.243          | -0.180          | -0.140          | -0.076         | -0.036         | -0.064          |
| <i>OsIRT1</i> -leaf    | 0.155           | 0.286           | 0.109           | 0.229           | <b>-0.717**</b> | <b>-0.700*</b> | <b>-0.641*</b> | 0.414           |
| <i>OsLCT1</i> -leaf    | <b>0.588*</b>   | <b>0.605*</b>   | <b>0.582*</b>   | <b>0.604*</b>   | -0.175          | -0.218         | -0.263         | 0.563           |
| <i>OsIRT2</i> -Leaf-V1 | -0.030          | -0.119          | 0.007           | -0.072          | -0.060          | -0.070         | -0.143         | -0.051          |
| <i>OsIRT2</i> -Leaf-V2 | -0.388          | -0.476          | -0.351          | -0.437          | 0.155           | 0.120          | 0.189          | -0.520          |

489

490 Table 7. Correlation of Cd uptake transporter gene expression with Cd accumulation and brown rice Cd content in rice at maturity. Group 1 indicates expression of  
 491 genes with varietal differences, and Group 2 with no varietal differences; Cd-A, Cd accumulation; CdBR, Cd content of brown rice.

|         | Cd content | V  | Root          |                |               |               |                 |                 | Leaf          |              |               |               |                |
|---------|------------|----|---------------|----------------|---------------|---------------|-----------------|-----------------|---------------|--------------|---------------|---------------|----------------|
|         |            |    | <i>OsLCD</i>  | <i>OsIRT1</i>  | <i>OsIRT2</i> | <i>OsLCT1</i> | <i>OsNramp5</i> | <i>OsNramp1</i> | <i>OsHMA3</i> | <i>OsLCD</i> | <i>OsIRT1</i> | <i>OsIRT2</i> | <i>OsLCT1</i>  |
| Group 1 | Cd-A       | V1 | 0.020         | -0.341         | -0.149        | -             | -               | 0.115           | 0.250         | -            | 0.309         | 0.080         | -0.321         |
|         | CdBR       |    | -0.062        | <b>-0.505*</b> | -0.112        | -             | -               | 0.354           | <b>0.573*</b> | -            | -0.441        | 0.231         | -0.488         |
|         | Cd-A       | V2 | <b>0.708*</b> | <b>-0.601*</b> | 0.381         | -             | -               | <b>0.749*</b>   | <b>0.725*</b> | -            | -0.207        | 0.330         | <b>-0.741*</b> |
|         | CdBR       |    | <b>0.616*</b> | -0.360         | 0.245         | -             | -               | <b>0.589*</b>   | <b>0.628*</b> | -            | 0.180         | 0.531         | -0.420         |
| Group 2 | Cd-A       | -  |               |                |               | -0.234        | <b>0.624*</b>   |                 |               | 0.018        |               |               |                |
|         | CdBR       | -  |               |                |               | -0.110        | <b>0.641*</b>   |                 |               | 0.187        |               |               |                |

492 Table 8. Partial relevancies of temperature and light factors with Cd-A and Cd-BR (with relative gene expression as a fixed factor)

| V     | Organs | Gene               | Cd-indicators | ST              | SAT             | AT              | AAT             | SH             | UR     | PR     | I      |
|-------|--------|--------------------|---------------|-----------------|-----------------|-----------------|-----------------|----------------|--------|--------|--------|
| V1    | Root   | <i>OsIRT1</i>      | CdBR          | <b>-0.930*</b>  | <b>-0.954*</b>  | <b>-0.907*</b>  | <b>-0.937*</b>  | <b>-0.883*</b> | -      | -      | -      |
|       |        | <i>OsHMA3</i>      | CdBR          | <b>-0.989**</b> | <b>-0.997**</b> | <b>-0.975**</b> | <b>-0.998**</b> | <b>-0.887*</b> | -      | -      | -      |
|       | Leaf   | <i>OsIRT1-Leaf</i> | Cd-A          | -               | -               | -               | -               | -              | -0.708 | -0.517 | -0.304 |
|       |        |                    | CdBR          | -               | -               | -               | -               | -              | -0.560 | -0.344 | -0.137 |
| V2    | Root   | <i>OsIRT1</i>      | Cd-A          | <b>-0.983**</b> | <b>-0.951*</b>  | <b>-0.975**</b> | <b>-0.976**</b> | -0.805         | -      | -      | -      |
|       |        |                    | Cd-A          | <b>-0.906*</b>  | <b>-0.886*</b>  | <b>-0.899*</b>  | <b>-0.890*</b>  | -0.751         | -      | -      | -      |
|       |        | <i>OsNramp1</i>    | CdBR          | -0.620          | -0.512          | -0.627          | -0.525          | -0.300         | -      | -      | -      |
|       |        |                    | Cd-A          | <b>-0.917*</b>  | <b>-0.895*</b>  | <b>-0.915*</b>  | <b>-0.899*</b>  | -0.774         | -      | -      | -      |
|       | Leaf   | <i>OsHMA3</i>      | CdBR          | -0.558          | -0.487          | -0.551          | -0.487          | -0.296         | -      | -      | -      |
|       |        |                    | Cd-A          | -               | -               | -               | -               | -              | 0.115  | 0.223  | 0.323  |
| V1&V2 | Root   | <i>OsIRT1-Leaf</i> | CdBR          | -               | -               | -               | -               | -              | -0.261 | -0.186 | -0.076 |
|       |        |                    | Cd-A          | <b>-0.983**</b> | <b>-0.934*</b>  | <b>-0.985**</b> | <b>-0.957*</b>  | -              | -      | -      | -      |
|       | Root   | <i>OsLCT1-Leaf</i> | Cd-A          | -0.566          | -0.555          | -0.564          | -0.571          | -0.336         | -      | -      | -      |
|       |        |                    | CdBR          | <b>-0.608*</b>  | -0.563          | -0.586          | -0.567          | -0.376         | -      | -      | -      |

493
